# Supplementary material for: Differences between CVID Granulomatosis and Sarcoidosis: Clinical, Immunological and Histopathological Comparison
Source: Research Square preprint supplement (doi:10.21203/rs.3.rs-1617117/v1), 2022-05-18
Supplement: Supplementary file 1 [file 3594c53b30868ddf6f51556a.docx]

**Supplemental Table 1** Blood laboratory values in CVID and sarcoidosis patients.

| Parameters | Normal range | CVID patients, *n* = 10 | Sarcoidosis patients, *n* = 11 | *P* value |
| --- | --- | --- | --- | --- |
| **Blood count**  Hemoglobin, g/dL  Neutrophils, G/L  Platelets, G/L | 13.4–16.7  1.92–6.63  150–398 | 14.55 (11.7–15.5)  2.97 (0.47–7.04)  137.5 (49–221) | 13.65 (12–16.2)  5.52 (3.3–5.91)  290.5 (212–469) | 0.4115  0.0644  **0.0016** |
| **Blood Inflammatory parameters** |  |  |  |  |
| Fibrinogen, g/L | 2–5 | 3.3 (2.3–3.8) | 3 (2.7–6.1) | 0.1514 |
| C-reactive protein, mg/L | <5 | 2.6 (0.6–7.6) | 12 (0.3–115.7) | 0.2113 |
| **Blood Creatininemia, µmol/L** | 64–104 | 72 (54–114) | 72.5 (59–186) | 0.6769 |
| **Total bilirubin, µmol/L** | 5–20 | 9 (4–18) | 10.5 (6–22) | 0.3318 |
| **Aspartate aminotransferase, IU/L** | 5–34 | 24 (16–71) | 31.5 (18–148) | 0.3756 |
| **Alanine aminotransferase, IU/L** | 6–55 | 22.5 (11–128) | 38.5 (13–385) | 0.3382 |
| **Alkaline phosphatase, IU/L** | 40–150 | 105 (63–174) | 72.5 (50–1432) | 0.5051 |
| **γ-Glutamyltranspeptidase, IU/L** | 12–64 | 26 (12–107) | 38.5 (13–4144) | 0.3942 |
| **Blood Calcemia, mmol/L** | 2.10–2.55 | 2.33 (2.03–2.58) | 2.46 (2.29–2.62) | 0.1730 |
| **ACE, IU/L** | 12–68 | 94 (38–134) | 61 (17–250) | **<0.0001** |
| **Total gamma globulins, g/L** | 7.8–16 | 4 (1.43–5.9) | 13.2 (8.5–21.6) | **<0.0001** |

Values are expressed as medians (ranges). ACE: angiotensin-converting enzyme. Significant values are in bold type.
